# Supplementary material for: Determining key upstream rainout and convection zones affecting δ18O in water vapor and precipitation based on 8-year continuous observations in the East Asian Monsoon region
Source: Research Square preprint supplement (doi:10.21203/rs.3.rs-493026/v1), 2021-05-19
Supplement: Supplementary file 1 [file 420d7d368c4ef541e199e23e.xlsx]

## Sheet: CN-Nanjing
Supplementary Table. Stable isotopes in water vapor and precipitation in Nanjing for summer rainy days from September 2011 to September 2019.
Date	δ18Oprecipitation (‰)	δDprecipitation (‰)	δ18Ovapor (‰)	δDvapor (‰)	Precipitation (mm)
2011-09-07	-5.48961	-32.7529			0.6
2011-09-30	-9.17492	-64.4901			10.3
2012-06-06	-9.53672	-75.3967			6
2012-06-07	-7.9543	-52.7611			1.8
2012-06-27	-6.72696	-49.4795			1.1
2012-06-28	-5.92229	-40.3455			8.8
2012-07-01	-6.39058	-44.6286			10.3
2012-07-03	-9.01358	-65.2868			36.8
2012-07-07	-7.46147	-49.9224			19.4
2012-07-11	-8.08812	-54.4537			1.7
2012-07-12	-8.28259	-60.1684			17.4
2012-07-13	-10.3963	-74.7447			23.4
2012-07-14	-14.7661	-106.024			55.9
2012-08-03	-6.72717	-44.2472			5.4
2012-08-08	-6.75392	-47.5279			28.4
2012-08-09	-7.84479	-56.5433			126.3
2012-08-13	-10.6446	-77.948			1.1
2012-08-20	-9.76966	-66.1157			4.2
2012-08-21	-9.13574	-60.3901			14.7
2012-08-27	-4.77069	-28.2681			0.4
2012-09-02	-5.99539	-34.9129			26.1
2012-09-07	-8.19301	-52.1205			1.4
2012-09-08	-8.48265	-50.3243			21.8
2012-09-09	-6.1333	-40.3337			12.4
2013-06-01	-5.18081	-24.8338			5.7
2013-06-07	-12.2469	-89.6739			29.7
2013-06-08	-13.5221	-101.222			4
2013-06-19			-17.14	-121.14	1.9
2013-06-23	-11.5422	-77.3319	-18.13	-127.13	66.1
2013-06-24			-16.8	-117.11	3
2013-06-25	-11.9547	-82.9477	-19.93	-142.59	54.6
2013-06-26			-19.67	-140.07	0.1
2013-06-27			-19.81	-143.63	1.6
2013-07-05	-12.8932	-92.8205	-19.78	-140.81	45.2
2013-07-06	-10.4222	-74.2345			56.5
2013-07-16	-7.92753	-58.1485	-19.15	-136.94	7.7
2013-07-20	-10.6668	-76.4393			5.8
2013-07-21	-11.8293	-82.4811			56.7
2013-07-22	-12.5207	-87.3233	-19.7	-140.24	2.7
2013-07-31			-18.78	-134.55	17.4
2013-08-19	-5.33225	-31.0591	-13.65	-93.23	7.1
2013-08-20	-5.05313	-26.8425			4.6
2013-08-22	-3.96754	-27.3039	-14.59	-102.04	4.3
2013-08-23			-15.79	-110.98	0.1
2013-08-24			-17.15	-120.85	38.8
2013-08-25	-11.2658	-77.8622	-18.35	-130.52	19.2
2013-08-26	-8.25762	-53.2602	-17.18	-118.91	41.4
2013-09-05	-7.59725	-58.6041	-18.2	-133.19	8.4
2013-09-06	-11.3023	-79.6162	-24.31	-176.11	15.9
2013-09-07	-13.8232	-102.165	-23.38	-169.94	2.2
2013-09-11	-7.82992	-64.0686	-21.47	-151.72	9
2013-09-24	-6.10525	-36.1153	-15.74	-108.46	24.8
2013-09-25			-17.14	-109.46	0.8
2013-09-28	-5.45472	-20.277	-15.36	-97.82	5.9
2014-06-01	-8.76387	-54.6156			26
2014-06-15	-4.47707	-33.7585	-14.85	-106.54	0.8
2014-06-16	-4.18736	-24.4226	-14.78	-105.1	3.5
2014-06-17	-5.376	-30.4308	-15.33	-106.22	14
2014-06-21			-19.43	-141.18	0.2
2014-06-22			-19.22	-138.78	0.1
2014-06-25			-18.23	-133.33	15.9
2014-06-26	-9.53906	-67.3776	-20.19	-144.9	51
2014-06-27	-9.94143	-71.1461			0.2
2014-07-01	-8.06696	-56.7735			3.4
2014-07-02	-8.04009	-56.6625	-17.98	-127.61	27.7
2014-07-04			-17.58	-125.62	18.5
2014-07-05	-8.33834	-57.898	-17.1	-122	64.7
2014-07-12	-6.33725	-42.4673	-15.15	-109.82	68.6
2014-07-13			-17	-119.55	2.3
2014-07-16			-21.59	-157.43	0.4
2014-07-17			-18.63	-134.58	0.3
2014-07-24	-10.1834	-67.6473			18.6
2014-07-27	-10.3568	-67.6689			24.7
2014-07-31	-9.77826	-66.9932			12.7
2014-08-01	-9.94621	-67.059			2.8
2014-08-07	-5.7219	-33.4396			5.4
2014-08-09	-5.09845	-29.5792			1.5
2014-08-13	-5.60629	-30.0647			38
2014-08-16			-18.64	-132.84	0.4
2014-08-17	-6.80415	-41.4869	-18.06	-129.94	20.1
2014-08-18	-10.7439	-77.6551	-20.17	-143.53	1.2
2014-08-23			-20.22	-146.65	0.9
2014-08-24	-11.2796	-78.81	-20.43	-146.98	8.4
2014-08-25	-11.8814	-84.5856	-20.03	-142.96	0.1
2014-08-27			-18.67	-130.25	16.2
2014-08-29			-15.91	-108.32	15.5
2014-08-31			-16.31	-112.44	28.6
2014-09-01	-8.05401	-46.7868	-16.62	-116.12	2.9
2014-09-02	-12.1493	-86.1672	-18.93	-133	3
2014-09-08	-9.25702	-59.1222	-16.98	-118.06	3.2
2014-09-09			-16.5	-111.76	0.1
2014-09-10			-15.26	-104.55	3.4
2014-09-11			-14.42	-91.64	0.3
2014-09-12	-6.86362	-30.0836	-16.32	-107.1	13.6
2014-09-13	-7.98925	-40.7686	-14.48	-97.21	14
2014-09-18	-9.14985	-53.0527	-17.73	-119.84	4.8
2014-09-19	-9.04611	-57.1333	-17.57	-121.5	5.1
2014-09-23			-15	-103.06	0.8
2014-09-24			-14.7	-99.61	0.1
2014-09-28			-15.39	-108.99	0.1
2014-09-29	-8.20074	-46.6143	-16.54	-116.18	37.8
2015-06-02	-7.96127	-52.6487	-14.53	-101.29	135
2015-06-03	-2.38425	-16.0356	-13.94	-94.7	0.5
2015-06-08			-14.76	-103.15	0.1
2015-06-15			-15.36	-109.96	0.2
2015-06-16	-9.5423	-66.753	-19.39	-135.78	96.2
2015-06-17	-9.9801	-69.115	-20.48	-145.26	94.2
2015-06-21	-4.20854	-36.2776	-15.76	-111.67	0.8
2015-06-22			-20.66	-146.38	0.1
2015-06-23			-19.41	-139.59	0.2
2015-06-25	-7.80367	-56.3247	-16.84	-121.96	8.1
2015-06-26	-11.5488	-81.2868	-20.84	-148.62	52.6
2015-06-27	-10.4989	-75.894	-21.74	-156.14	204.1
2015-06-28	-11.7244	-82.8948	-21.68	-156.23	33.4
2015-06-29	-6.06162	-38.6994	-20.61	-148.93	31.4
2015-06-30	-6.8514	-48.4652	-16.09	-116.52	4.6
2015-07-01			-14.87	-104.5	0.2
2015-07-03			-16.53	-116.95	13.3
2015-07-04			-19.09	-136.7	5
2015-07-06	-6.00703	-56.8332	-19.16	-140.65	8.1
2015-07-07			-18.32	-130.81	2.5
2015-07-08	-5.28621	-39.98	-16.34	-115.63	4.8
2015-07-09	-7.8262	-57.3843	-17.42	-124.61	17.1
2015-07-11	-7.37682	-54.5258	-17.19	-124.84	1.6
2015-07-12	-10.494	-81.6562	-20.74	-151.42	3.3
2015-07-13	-7.30334	-50.9113	-16.18	-114.54	56.1
2015-07-17	-4.42491	-27.7978	-14.68	-104.27	41.6
2015-07-18	-4.15926	-26.8391	-15.79	-112.36	0.2
2015-07-19	-7.15117	-46.9413	-16.06	-114.73	60.2
2015-07-23	-5.08856	-33.2787	-13.48	-95.04	27.6
2015-07-24	-9.73824	-72.0936	-20.28	-147.47	13.1
2015-07-25	-13.2329	-99.1338	-22.94	-167.91	3.3
2015-08-06			-15.37	-104.41	5.6
2015-08-07	-3.37768	-21.0473	-15.1	-105.99	1
2015-08-08	-3.30424	-25.1737	-15.19	-108.83	21
2015-08-09	-2.05274	-10.4199	-14.04	-100.03	2.5
2015-08-10	-6.19073	-45.0153	-15.22	-107.94	142.2
2015-08-11	-8.98168	-62.8008	-20.21	-143.88	5.9
2015-08-13			-17.67	-128.6	2
2015-08-16			-18.2	-127.81	0.3
2015-08-20			-16.39	-115.42	4.6
2015-08-24			-17.26	-123.04	0.1
2015-08-25			-17.66	-126.3	0.1
2015-08-30			-15.53	-107.58	0.4
2015-08-31			-13.55	-92.33	1.7
2015-09-04	-6.865	-44.183	-16.33	-118.54	2
2015-09-05	-10.3378	-73.2076	-18.4	-134.26	34.1
2015-09-15			-16.41	-114.72	1.6
2015-09-16	-3.60495	-21.0554	-14.79	-102.96	0.1
2015-09-23	-6.23455	-41.7938	-16.98	-122.78	12.6
2015-09-25			-14.83	-107.37	0.9
2015-09-29	-3.40772	-16.17	-12.81	-93.53	9.8
2015-09-30	-4.94789	-30.0976	-15.15	-113.34	2.5
2016-06-01			-16.515	-110.724	35.7
2016-06-03	-4.474	-22.273	-14.9199	-99.0969	11.2
2016-06-04			-14.265	-93.0675	0.8
2016-06-08	-4.4174	-23.9723	-14.32	-97.3732	6.7
2016-06-12	-4.47531	-38.2692	-18.0272	-127.374	11.6
2016-06-16			-16.8602	-114.309	0.2
2016-06-20	-6.8773	-54.2129	-19.3733	-138.527	4.5
2016-06-21	-6.354	-39.94	-16.7162	-115.429	1.1
2016-06-22	-8.549	-61.215			28.8
2016-06-24	-10.823	-78.27			39.7
2016-06-25	-9.897	-71.984	-19.7748	-141.401	9.6
2016-06-27	-11.178	-74.729	-21.1029	-147.442	33.5
2016-06-28			-21.3164	-150.026	2.8
2016-07-01	-17.155	-126.56	-27.3093	-197.228	116.8
2016-07-02	-21.328	-162.338	-29.8901	-218.332	35.7
2016-07-03	-19.275	-143.115	-29.5894	-213.212	16.7
2016-07-04	-15.511	-111.673	-24.2384	-172.833	71.1
2016-07-05			-23.472	-168.618	70.9
2016-07-06	-6.70126	-56.2544	-21.993	-157.933	2.3
2016-07-07	-5.66304	-40.9203	-15.8906	-108.823	66
2016-07-13	-6.83764	-51.1657	-18.3229	-128.526	8.5
2016-07-14	-9.5154	-67.1468	-18.9961	-133.994	60
2016-07-15	-8.61635	-62.4395	-19.1203	-134.449	29.3
2016-08-02	-6.89744	-45.3271	-15.2046	-104.025	3.3
2016-08-03	-10.3057	-69.1328	-18.6545	-129.558	20.6
2016-08-04	-7.52178	-56.0235	-18.323	-127.793	17.5
2016-08-06	-8.49082	-57.4266	-17.6853	-123.212	17.9
2016-08-10			-14.1602	-97.6177	0.2
2016-09-06	-4.611	-36.243			0.8
2016-09-07	-5.971	-36.699			2.7
2016-09-16	-11.63	-83.839			67.2
2016-09-28	-6.384	-37.026			7.4
2016-09-29	-6.228	-34.159			27.7
2017-06-05	-3.58372	-18.1182	-14.6629	-100.537	21.4
2017-06-06	-4.85744	-22.2493	-14.3494	-100.078	3.1
2017-06-10			-20.7472	-147.695	245.3
2017-06-11	-12.5742	-83.2231	-22.3402	-160.512	0.4
2017-06-22	-12.6959	-92.8551	-20.7921	-154.502	4.1
2017-06-25			-18.6623	-138.07	0.2
2017-06-27	-7.42167	-50.1446	-16.7349	-121.471	12
2017-06-30	-12.7771	-92.0194	-21.0071	-151.234	22.6
2017-07-01	-10.4275	-73.6077	-19.6871	-143.267	9.4
2017-07-02	-13.1384	-95.705	-19.7165	-143.486	35.7
2017-07-03	-12.4266	-93.5124	-20.8641	-154.34	5.9
2017-07-05	-7.77957	-55.4626	-17.1993	-127.031	2.7
2017-07-07	-12.1187	-87.4346	-16.7073	-117.929	0.2
2017-07-08	-8.33224	-62.9844	-19.6785	-142.079	0.4
2017-07-09	-10.8274	-76.6716	-19.0986	-139.792	3.7
2017-07-10			-23.6778	-175.538	37.9
2017-07-29			-14.4166	-102.018	3.7
2017-08-01	-7.55753	-54.0249	-17.0848	-125.391	3.3
2017-08-02			-15.9103	-116.928	2.7
2017-08-03	-9.55359	-69.5545	-17.4796	-127.468	0.4
2017-08-08	-10.806	-73.3254	-18.4885	-134.907	71.6
2017-08-09	-10.8323	-72.8533	-21.5974	-158.257	25.4
2017-08-12	-10.8682	-74.5907	-20.229	-152.214	30
2017-08-13			-20.3086	-151.168	7.5
2017-08-14			-19.219	-141.45	0.2
2017-08-15			-18.0306	-129.403	0.1
2017-08-16	-9.65313	-68.2841	-18.0714	-131.74	7.2
2017-08-19	-7.75318	-51.1628	-16.6082	-120.42	1.6
2017-08-20			-18	-129.295	10.1
2017-08-25			-16.0429	-115.544	49.5
2017-08-26			-14.6699	-102.974	2.1
2017-08-29			-15.6781	-108.999	2.2
2017-08-31			-16.1188	-110.538	3.2
2017-09-01			-15.9837	-109.761	1.1
2017-09-03			-14.0973	-96.6665	9.8
2017-09-04	-5.22714	-25.5155	-14.2432	-97.6368	5.3
2017-09-06	-6.01806	-30.7711	-16.2866	-115.257	4
2017-09-10			-16.5611	-117.719	5.6
2017-09-11			-18.6085	-135.188	1
2017-09-19			-13.732	-97.9415	0.1
2017-09-20			-15.0768	-108.176	9
2017-09-21	-7.79016	-46.8408	-15.8036	-114.243	0.6
2017-09-24	-10.1313	-63.1532	-21.3975	-152.211	45.5
2018-06-09	-9.42248	-62.0425	-17.6513	-125.784	11.9
2018-06-10			-16.8153	-120.697	0.1
2018-06-14			-14.4963	-97.925	1
2018-06-19	-4.52774	-24.2508	-14.4142	-104.098	8.9
2018-06-22	-4.27149	-34.1632	-15.8345	-112.379	3.8
2018-06-28	-8.66611	-55.8506	-17.7612	-127.201	23.2
2018-06-30	-6.57837	-45.9629	-16.6065	-117.595	0.2
2018-07-01	-9.39487	-62.6378	-18.9102	-135.675	14.7
2018-07-04	-7.54249	-47.9002	-15.5815	-116.227	1.2
2018-07-05	-11.4395	-78.5695			71
2018-07-06	-8.79632	-56.6638			56.5
2018-07-22	-6.56483	-41.5325	-16.8293	-118.807	9.7
2018-07-23			-17.081	-122.034	0.1
2018-07-26	-8.57857	-56.0024	-17.2121	-121.406	14.3
2018-07-27			-18.8804	-133.863	1.2
2018-07-29	-6.18471	-44.2781	-17.6699	-123.638	6.4
2018-07-30			-17.6714	-121.69	4.6
2018-08-03	-6.16534	-36.6709	-15.5824	-110.323	24.9
2018-08-04			-17.0159	-121.312	1
2018-08-05			-16.0774	-112.955	2.6
2018-08-13	-6.4371	-40.5426	-15.6986	-111.817	36.2
2018-08-16	-7.80168	-50.5461	-15.5906	-109.777	17.5
2018-08-17	-13.6737	-98.6218	-20.035	-153.911	124.2
2018-08-18	-10.0902	-71.4404	-15.1808	-110.963	15.7
2018-08-19	-6.56823	-45.0771	-16.0145	-117.366	0.8
2018-08-20	-10.8101	-74.4442	-19.9455	-147.423	9.6
2018-08-31	-13.7597	-102.281	-18.5263	-136.728	41.1
2018-09-01	-8.61084	-56.9079	-14.4422	-104.328	3.7
2018-09-03			-16.7942	-125.448	27.9
2018-09-11			-14.4828	-95.782	0.1
2018-09-13	-2.41709	-5.74027	-13.0051	-90.8951	0.3
2018-09-17	-6.16025	-34.9436	-15.0091	-108.778	9.3
2018-09-18			-16.546	-122.901	0.8
2018-09-20	-8.05849	-57.4435	-18.2434	-136.444	1.8
2018-09-21	-10.9341	-77.877	-19.3398	-144.097	22.3
2018-10-09	-3.24813	-8.11032	-13.8108	-95.2605	21.8
2018-10-15	-3.61182	-12.5687	-15.9656	-101.013	5.9
2018-10-16	-6.87844	-34.5702	-16.7897	-114.744	2.5
2018-10-22	-4.63772	-6.92129	-14.9549	-96.9151	5.8
2018-10-25	-3.87748	-11.6791	-14.5049	-97.3534	1.3
2018-10-26			-14.5331	-99.619	0.2
2018-11-05	-4.50603	-16.0675			2.8
2018-11-06	-5.0328	-15.2287			7.3
2018-11-07	-7.63283	-36.8349			23.2
2018-11-08	-9.17965	-52.068			9.7
2018-11-15	-5.31406	-18.279	-15.2077	-101.631	0.3
2018-11-16			-16.1417	-108.248	0.1
2018-11-17	-7.34701	-31.6569	-16.3788	-105.598	0.1
2018-11-18	-4.34344	-10.8834	-17.64	-118.132	14.5
2018-11-21	-5.71857	-20.3786	-15.7244	-106.243	6.2
2018-12-02			-13.8219	-93.9683	0.1
2018-12-03	-3.44501	-4.25407	-13.5931	-92.6882	2.4
2018-12-04	-5.97545	-24.9539	-16.9804	-114.874	17
2018-12-05	-5.0962	-9.00382	-16.4872	-104.865	5.8
2018-12-06	-6.91128	-28.1857	-17.9015	-121.51	19.2
2018-12-07			-19.0035	-122.95	3.3
2018-12-09	-6.82772	-25.3661	-17.9883	-114.953	0.7
2018-12-10	-6.8004	-21.9401	-16.9263	-111.167	11.9
2018-12-11	-8.71921	-45.0053	-18.4702	-126.439	3.9
2018-12-15	-5.68736	-10.7696	-16.8963	-108.822	2.1
2018-12-16			-15.908	-103.055	2.2
2018-12-19	-2.09296	-2.97053	-15.5814	-102.29	5.3
2018-12-22			-16.5778	-117.071	9.1
2018-12-23			-18.5496	-128.278	2
2018-12-25	-4.81688	-11.2427	-15.5944	-103.045	3.1
2018-12-26	-5.71044	-16.4703	-16.3853	-107.668	13.9
2018-12-27			-16.9981	-108.728	0.8
2018-12-30	-15.4973	-110.435	-20.248	-132.64	2.2
2019-06-06	-7.0825	-38.7351	-16.2187	-113.283	34.8
2019-06-17	-2.46891	-16.0194	-14.4631	-102.179	8
2019-06-18	-8.66475	-57.3168	-17.4177	-123.345	22.6
2019-06-20			-16.1536	-118.038	13.5
2019-06-26	-5.45715	-35.3549	-16.1062	-115.786	2.7
2019-06-29	-6.01475	-35.9838	-15.0917	-106.185	27.1
2019-06-30			-15.2751	-106.928	0.5
2019-07-01	-6.36846	-43.1129	-14.7978	-106.704	0.3
2019-07-06	-8.15753	-53.2989	-16.8147	-121.569	16.7
2019-07-07			-16.9175	-117.003	0.1
2019-07-09	-5.58841	-34.0729	-14.6301	-105.13	2
2019-07-12			-17.802	-131.184	31.8
2019-07-13			-22.5098	-163.625	3.3
2019-07-19			-15.8705	-118.579	0.1
2019-07-25			-14.6784	-106.951	9.6
2019-08-04			-14.9133	-107.763	5.2
2019-08-08			-13.8795	-101.313	22.6
2019-08-09			-14.4797	-107.265	13.2
2019-08-10	-6.69074	-45.4376	-13.2992	-100.338	49.6
2019-08-11			-18.6841	-137.654	0.7
2019-08-18	-4.85895	-27.325	-14.7556	-101.278	5.2
2019-08-27	-9.3535	-65.4129			15.7
2019-08-28			-15.1686	-113.873	10.8
2019-09-01			-16.8643	-119.671	0.4
2019-09-02	-10.2406	-72.096	-20.8053	-150.172	12.1
2019-09-03	-8.45499	-53.603	-18.2215	-130.743	0.7
2019-09-05	-8.4199	-53.248	-17.0708	-122.835	4.9
2019-09-06			-15.6947	-113.048	32.3
2019-09-15			-15.6229	-103.807	1
